# Supplementary material for: Enhancing magnetic relaxation through subcomponent self-assembly from a Dy2to Dy4grid
Source: Royal Society of Chemistry journal article supplement (doi:10.1039/d2dt02996k), 2022-01-01
Supplement: d2dt02996k1.pdf [file d2dt02996k1.pdf]

## Supporting Information

### Enhancing the magnetic relaxation through subcomponent self-assembly from linear Dy<sub>2</sub> to Dy<sub>4</sub> grid

Xiao-Lei Li,<sup>ac‡</sup> Zhifang Ma,<sup>a‡</sup> Jinjiang Wu,<sup>ab</sup> Quan Zhou,<sup>ab</sup> Jinkui Tang<sup>\*ab</sup>

<sup>a</sup>State Key Laboratory of Rare Earth Resource Utilization, Changchun Institute of Applied Chemistry, Chinese Academy of Sciences, Changchun 130022, P. R. China

E-mail: tang@ciac.ac.cn

<sup>b</sup>School of Applied Chemistry and Engineering, University of Science and Technology of China, Hefei 230026, P. R. China

<sup>c</sup>Key Laboratory of Advanced Energy Materials Chemistry (Ministry of Education), College of Chemistry, Nankai University, Tianjin 300071, P. R. China

‡ These authors contributed equally to this work.



**Table S1.** Crystal data and structure refinement parameters for **1–4**.

| Code                                  | <b>1</b>                                                                        | <b>2</b>                                                                        | <b>3</b>                                                                          | <b>4</b>                                                                                          |
|---------------------------------------|---------------------------------------------------------------------------------|---------------------------------------------------------------------------------|-----------------------------------------------------------------------------------|---------------------------------------------------------------------------------------------------|
| Formula                               | C <sub>38</sub> H <sub>60</sub> Dy <sub>2</sub> N <sub>16</sub> O <sub>22</sub> | C <sub>52</sub> Dy <sub>2</sub> H <sub>82</sub> N <sub>12</sub> O <sub>28</sub> | C <sub>50</sub> H <sub>62</sub> Dy <sub>2</sub> N <sub>12</sub> O <sub>18.7</sub> | C <sub>104</sub> Dy <sub>4</sub> H <sub>121</sub> N <sub>14</sub> Na <sub>2</sub> O <sub>41</sub> |
| F <sub>w</sub> (g mol <sup>-1</sup> ) | 1418.02                                                                         | 1648.29                                                                         | 1455.31                                                                           | 2919.12                                                                                           |
| Cryst syst                            | Monoclinic                                                                      | Monoclinic                                                                      | Monoclinic                                                                        | Monoclinic                                                                                        |
| Space group                           | C2/c                                                                            | I2/a                                                                            | P2 <sub>1</sub> /c                                                                | P2 <sub>1</sub>                                                                                   |
| T (K)                                 | 296(2)                                                                          | 296(2)                                                                          | 296(2)                                                                            | 296(2)                                                                                            |
| a (Å)                                 | 21.314(5)                                                                       | 20.468(5)                                                                       | 11.3758(17)                                                                       | 12.3852(6)                                                                                        |
| b (Å)                                 | 14.009(3)                                                                       | 15.259(2)                                                                       | 12.797(2)                                                                         | 32.5128(16)                                                                                       |
| c (Å)                                 | 19.509(4)                                                                       | 24.156(3)                                                                       | 22.018(3)                                                                         | 15.4534(7)                                                                                        |
| α [°]                                 | 90                                                                              | 90                                                                              | 90                                                                                | 90                                                                                                |
| β [°]                                 | 105.499(4)                                                                      | 108.887(13)                                                                     | 100.741(3)                                                                        | 106.5540(10)                                                                                      |
| γ [°]                                 | 90                                                                              | 90                                                                              | 90                                                                                | 90                                                                                                |
| V(Å <sup>3</sup> )                    | 5613(2)                                                                         | 7138(2)                                                                         | 3149.1(8)                                                                         | 5964.8(5)                                                                                         |
| Cryst color                           | yellow                                                                          | yellow                                                                          | yellow                                                                            | yellow                                                                                            |
| Z                                     | 4                                                                               | 4                                                                               | 2                                                                                 | 2                                                                                                 |
| μ(mm <sup>-1</sup> )                  | 2.729                                                                           | 2.152                                                                           | 2.432                                                                             | 2.565                                                                                             |
| F(000)                                | 2832                                                                            | 3056                                                                            | 1476                                                                              | 2738                                                                                              |
| R <sub>int</sub>                      | 0.0302                                                                          | 0.0395                                                                          | 0.0458                                                                            | 0.0524                                                                                            |
| *R <sub>1</sub> [ I  > 2σ(I)]         | 0.0277                                                                          | 0.0365                                                                          | 0.0378                                                                            | 0.056                                                                                             |
| *wR <sub>2</sub> [ I  > 2σ(I)]        | 0.0603                                                                          | 0.0962                                                                          | 0.0917                                                                            | 0.1165                                                                                            |
| *R <sub>1</sub> (all data)            | 0.0400                                                                          | 0.0447                                                                          | 0.0727                                                                            | 0.0805                                                                                            |
| *wR <sub>2</sub> (all data)           | 0.0667                                                                          | 0.1004                                                                          | 0.1095                                                                            | 0.1302                                                                                            |
| GOF                                   | 1.010                                                                           | 1.036                                                                           | 1.002                                                                             | 1.039                                                                                             |

\*R<sub>1</sub> =  $\sum ||F_o| - |F_c|| / \sum |F_o|$  for  $F_o > 2\sigma(F_o)$ ;  $wR_2 = (\sum w(F_o^2 - F_c^2)^2 / \sum wF_c^2)^{1/2}$  all reflections,  $w = 1/[\sigma^2(F_o^2) + (0.1557P)^2]$  where  $P = (F_o^2 + 2F_c^2)/3$

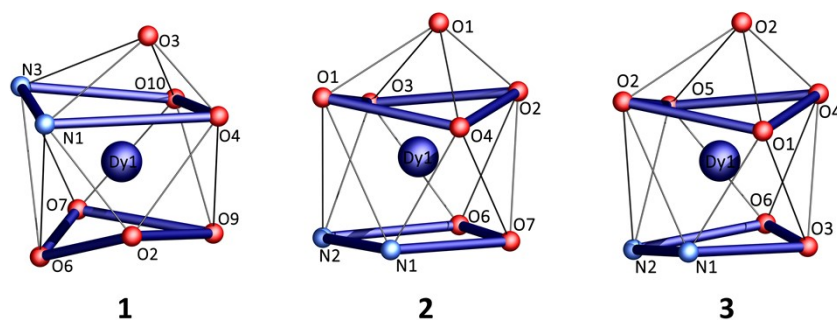**Figure S1.** Coordination polyhedra observed in **1–3**.

**Table S2.** Dy<sup>III</sup> geometry analysis of **1–3** by SHAPE 2.1 software.<sup>1</sup>

| Dy <sup>III</sup>     | MFF-9<br>(C <sub>s</sub> ) | CSAPR-9<br>(C <sub>4v</sub> ) | TCTPR-9<br>(D <sub>3h</sub> ) | JCSAPR-9<br>(C <sub>4v</sub> ) | JTCTPR-9<br>(D <sub>3h</sub> ) |
|-----------------------|----------------------------|-------------------------------|-------------------------------|--------------------------------|--------------------------------|
| Dy <sup>III</sup> (1) | <b>2.345</b>               | 2.583                         | 2.682                         | 3.484                          | 3.857                          |
| Dy <sup>III</sup> (2) | 1.938                      | <b>1.770</b>                  | 2.797                         | 1.956                          | 3.362                          |
| Dy <sup>III</sup> (3) | 2.279                      | <b>2.232</b>                  | 2.646                         | 2.278                          | 2.414                          |

**MFF-9 = Muffin; CSAPR-9 = Spherical capped square antiprism; TCTPR-9 = Spherical tricapped trigonal prism; JCSAPR-9 = Capped square antiprism J10; JTCTPR-9 = Tricapped trigonal prism J51.**

**Table S3:** Selected bond Lengths and Dy···Dy distances in Å for **2** and **3**.

| <b>2</b>   |                        |                 | <b>3</b>   |                        |                 |
|------------|------------------------|-----------------|------------|------------------------|-----------------|
| Atoms      | Atoms                  | Length          | Atoms      | Atoms                  | Length          |
| Dy1        | O1                     | 2.224(7)        | Dy1        | O1                     | 2.228(4)        |
| Dy1        | O2                     | 2.319(9)        | Dy1        | O2                     | 2.321(5)        |
| Dy1        | O2 <sup>1</sup>        | 2.643(8)        | Dy1        | O2 <sup>2</sup>        | 2.706(5)        |
| Dy1        | O3 <sup>1</sup>        | 2.436(9)        | Dy1        | O3 <sup>2</sup>        | 2.409(5)        |
| Dy1        | O4                     | 2.402(8)        | Dy1        | O4                     | 2.391(4)        |
| Dy1        | O5                     | 2.431(9)        | Dy1        | O5                     | 2.371(5)        |
| Dy1        | O6                     | 2.441(9)        | Dy1        | O6                     | 2.556(5)        |
| Dy1        | N1                     | 2.554(10)       | Dy1        | N1                     | 2.573(6)        |
| Dy1        | N2                     | 2.524(9)        | Dy1        | N2                     | 2.481(3)        |
| <b>Dy1</b> | <b>Dy1<sup>1</sup></b> | <b>4.126(3)</b> | <b>Dy1</b> | <b>Dy1<sup>2</sup></b> | <b>4.171(2)</b> |

<sup>1</sup>1/2-x,3/2-y,3/2-z, <sup>2</sup>1-x,1-y,1-z

**Table S4.** Selected bond Angles in ° for **2** and **3**.

| <b>2</b>        |       |                 |          | <b>3</b>        |       |                 |            |
|-----------------|-------|-----------------|----------|-----------------|-------|-----------------|------------|
| Atoms           | Atoms | Atoms           | Angle/°  | Atoms           | Atoms | Atoms           | Angle/°    |
| O1              | Dy1   | O2              | 83.1(3)  | O1              | Dy1   | O2              | 83.18(16)  |
| O1              | Dy1   | O2 <sup>1</sup> | 70.4(3)  | O1              | Dy1   | O2 <sup>2</sup> | 69.80(14)  |
| O1              | Dy1   | O3 <sup>1</sup> | 80.9(3)  | O1              | Dy1   | O3 <sup>2</sup> | 79.82(17)  |
| O1              | Dy1   | O4              | 139.0(3) | O1              | Dy1   | O4              | 138.47(17) |
| O1              | Dy1   | O5              | 84.4(3)  | O1              | Dy1   | O5              | 87.10(17)  |
| O1              | Dy1   | O6              | 135.6(3) | O1              | Dy1   | O6              | 135.69(17) |
| O1              | Dy1   | N1              | 70.1(3)  | O1              | Dy1   | N1              | 69.55(17)  |
| O1              | Dy1   | N2              | 130.9(3) | O1              | Dy1   | N2              | 131.93(15) |
| O2              | Dy1   | O2 <sup>1</sup> | 67.7(3)  | O2              | Dy1   | O2 <sup>2</sup> | 68.12(18)  |
| O2              | Dy1   | O3 <sup>1</sup> | 118.6(3) | O2              | Dy1   | O3 <sup>2</sup> | 117.82(18) |
| O2              | Dy1   | O4              | 74.0(3)  | O2              | Dy1   | O4              | 73.34(14)  |
| O2              | Dy1   | O5              | 158.3(3) | O2              | Dy1   | O5              | 158.96(17) |
| O2              | Dy1   | O6              | 141.3(3) | O2              | Dy1   | O6              | 141.01(15) |
| O2              | Dy1   | N1              | 88.3(3)  | O2              | Dy1   | N1              | 85.55(18)  |
| O2              | Dy1   | N2              | 78.2(3)  | O2              | Dy1   | N2              | 83.47(15)  |
| O3 <sup>1</sup> | Dy1   | O2 <sup>1</sup> | 51.1(3)  | O3 <sup>1</sup> | Dy1   | O2 <sup>2</sup> | 49.83(17)  |

|                 |           |                        |                 |                 |           |                        |                   |
|-----------------|-----------|------------------------|-----------------|-----------------|-----------|------------------------|-------------------|
| O3 <sup>1</sup> | Dy1       | O6                     | 78.2(3)         | O3 <sup>1</sup> | Dy1       | O6                     | 75.36(18)         |
| O3 <sup>1</sup> | Dy1       | N1                     | 137.8(3)        | O3 <sup>1</sup> | Dy1       | N1                     | 138.99(18)        |
| O3 <sup>1</sup> | Dy1       | N2                     | 147.4(3)        | O3 <sup>1</sup> | Dy1       | N2                     | 145.71(15)        |
| O4              | Dy1       | O2 <sup>1</sup>        | 69.6(2)         | O4              | Dy1       | O2 <sup>2</sup>        | 69.80(13)         |
| O4              | Dy1       | O3 <sup>1</sup>        | 81.0(3)         | O4              | Dy1       | O3 <sup>2</sup>        | 81.59(16)         |
| O4              | Dy1       | O6                     | 75.0(3)         | O4              | Dy1       | O6                     | 72.81(15)         |
| O4              | Dy1       | O5                     | 126.1(3)        | O4              | Dy1       | O5                     | 124.75(16)        |
| O4              | Dy1       | N1                     | 140.4(3)        | O4              | Dy1       | N1                     | 139.25(17)        |
| O4              | Dy1       | N2                     | 77.2(3)         | O4              | Dy1       | N2                     | 79.47(14)         |
| O5              | Dy1       | O2 <sup>1</sup>        | 123.9(3)        | O5              | Dy1       | O2 <sup>2</sup>        | 125.39(17)        |
| O5              | Dy1       | O3 <sup>1</sup>        | 76.6(3)         | O5              | Dy1       | O3 <sup>2</sup>        | 78.42(19)         |
| O5              | Dy1       | O6                     | 52.8(3)         | O5              | Dy1       | O6                     | 52.44(17)         |
| O5              | Dy1       | N1                     | 70.8(3)         | O5              | Dy1       | N1                     | 73.56(19)         |
| O5              | Dy1       | N2                     | 97.1(3)         | O5              | Dy1       | N2                     | 89.31(17)         |
| O6              | Dy1       | O2 <sup>1</sup>        | 120.8(3)        | O6              | Dy1       | O2 <sup>2</sup>        | 116.23(16)        |
| O6              | Dy1       | N1                     | 101.5(3)        | O6              | Dy1       | N1                     | 108.40(18)        |
| O6              | Dy1       | N2                     | 72.9(3)         | O6              | Dy1       | N2                     | 71.85(16)         |
| N1              | Dy1       | O2 <sup>1</sup>        | 135.6(3)        | N1              | Dy1       | O2 <sup>2</sup>        | 133.51(15)        |
| N2              | Dy1       | O2 <sup>1</sup>        | 137.4(3)        | N2              | Dy1       | O2 <sup>2</sup>        | 142.71(14)        |
| N2              | Dy1       | N1                     | 64.4(3)         | N2              | Dy1       | N1                     | 63.51(15)         |
| N3              | N1        | Dy1                    | 116.9(7)        | N3              | N1        | Dy1                    | 117.3(4)          |
| <b>Dy1</b>      | <b>O2</b> | <b>Dy1<sup>1</sup></b> | <b>112.3(3)</b> | <b>Dy1</b>      | <b>O2</b> | <b>Dy1<sup>2</sup></b> | <b>111.88(18)</b> |

<sup>1</sup>1/2-x,3/2-y,3/2-z, <sup>2</sup>1-x,1-y,1-z

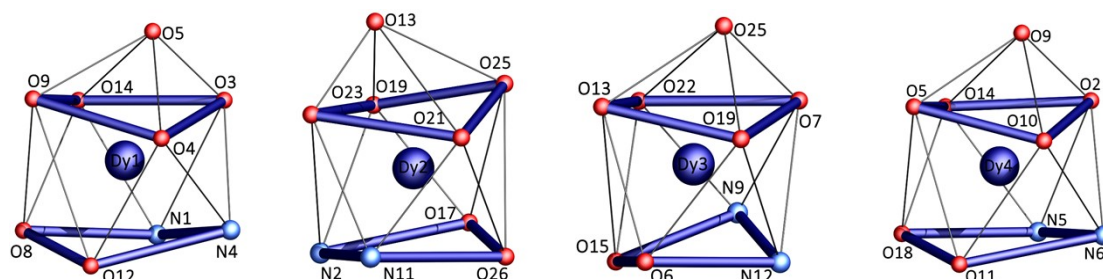

Figure S2. Coordination polyhedra observed in **4**.

Table S5. Dy<sup>III</sup> geometry analysis of **4** by SHAPE 2.1 software.<sup>1</sup>

| Dy <sup>III</sup>     | MFF-9<br>(C <sub>s</sub> ) | CSAPR-9<br>(C <sub>4v</sub> ) | TCTPR-9<br>(D <sub>3h</sub> ) | JCSAPR-9<br>(C <sub>4v</sub> ) | JTCTPR-9<br>(D <sub>3h</sub> ) |
|-----------------------|----------------------------|-------------------------------|-------------------------------|--------------------------------|--------------------------------|
| Dy <sup>III</sup> (1) | <b>1.954</b>               | 2.525                         | 3.290                         | 3.052                          | 2.687                          |
| Dy <sup>III</sup> (2) | 2.938                      | 2.912                         | 3.470                         | <b>2.386</b>                   | 2.886                          |
| Dy <sup>III</sup> (3) | <b>1.980</b>               | 2.315                         | 3.000                         | 2.873                          | 2.408                          |
| Dy <sup>III</sup> (4) | 2.293                      | 2.237                         | 2.806                         | <b>2.165</b>                   | 2.824                          |

MFF-9 = Muffin; CSAPR-9 = Spherical capped square antiprism; TCTPR-9 = Spherical tricapped trigonal prism; JCSAPR-9 = Capped square antiprism J10; JTCTPR-9 = Tricapped trigonal prism J51.

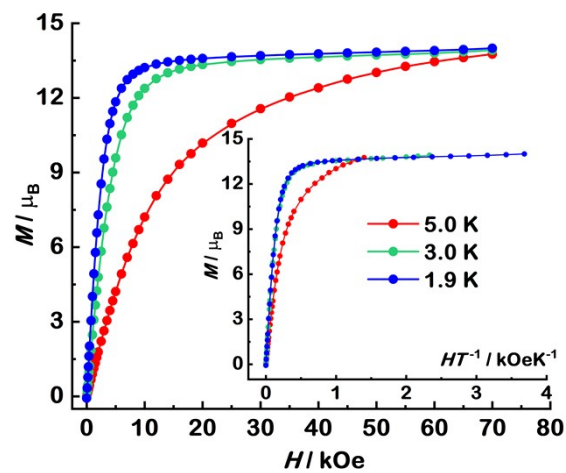

**Figure S3.** Field dependences of magnetization in the field range 0–70 kOe and temperature range 1.9–5.0 K for **1**. Inset: Plots of the reduced magnetization  $M$  versus  $H/T$ .

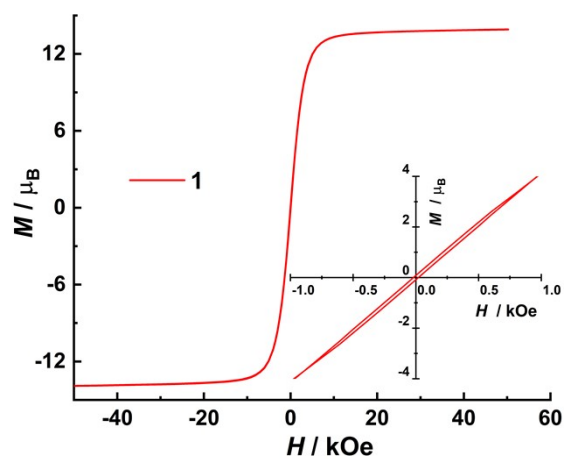

**Figure S4.**  $M(H)$  hysteresis for **1** using a scan rate of  $2.0 \text{ mTs}^{-1}$ .

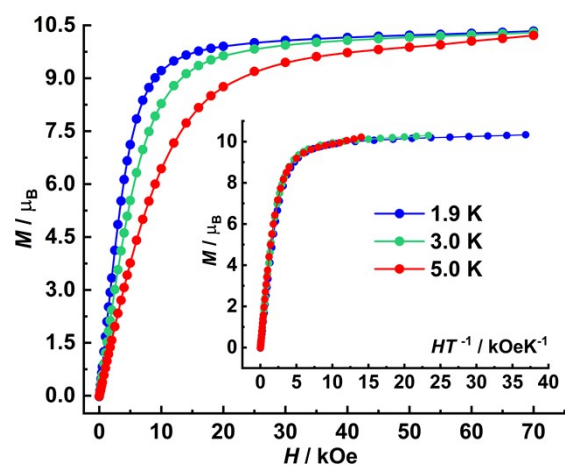

**Figure S5.** Field dependences of magnetization in the field range 0–70 kOe and temperature range 1.9–5.0 K for **2**. Inset: Plots of the reduced magnetization  $M$  versus  $H/T$ .

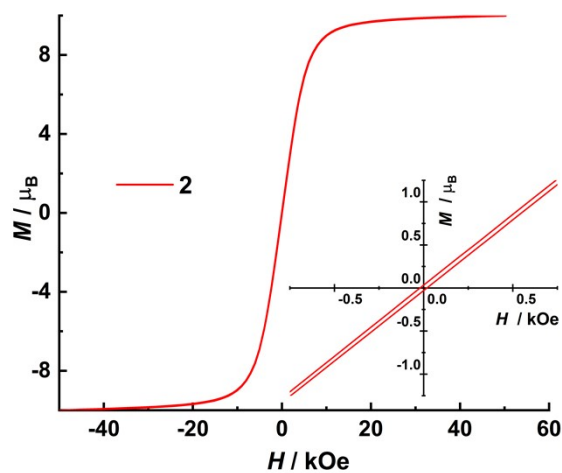

**Figure S6.**  $M(H)$  hysteresis for **2** using a scan rate of  $2.0 \text{ mTs}^{-1}$ .

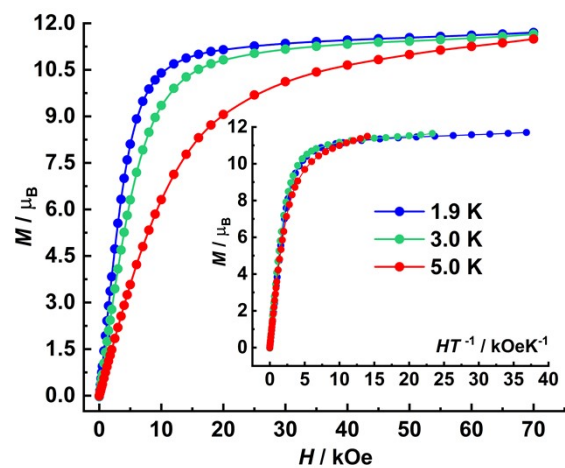

**Figure S7.** Field dependences of magnetization in the field range 0–70 kOe and temperature range 1.9–5.0 K for **3**. Inset: Plots of the reduced magnetization  $M$  versus  $H/T$ .

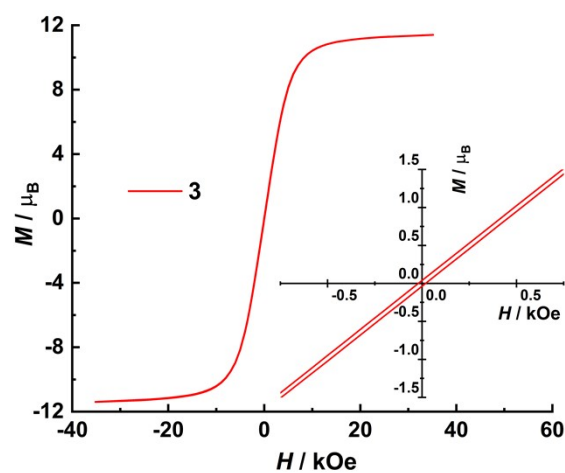

**Figure S8.**  $M(H)$  hysteresis for **3** using a scan rate of  $2.0 \text{ mTs}^{-1}$ .



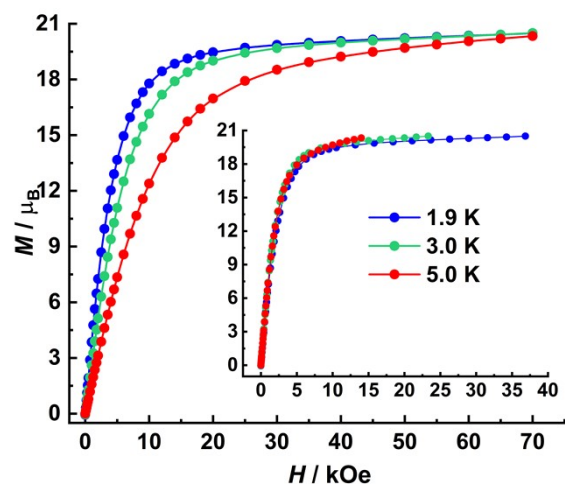

**Figure S9.** Field dependences of magnetization in the field range 0–70 kOe and temperature range 1.9–5.0 K for **4**. Inset: Plots of the reduced magnetization  $M$  versus  $H/T$ .

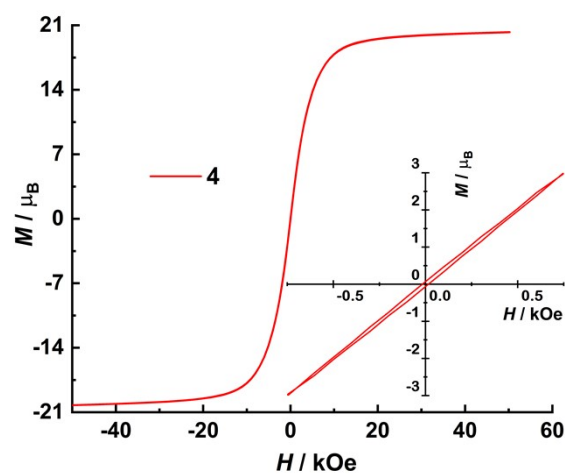

**Figure S10.**  $M(H)$  hysteresis for **4** using a scan rate of  $2.0 \text{ mTs}^{-1}$ .

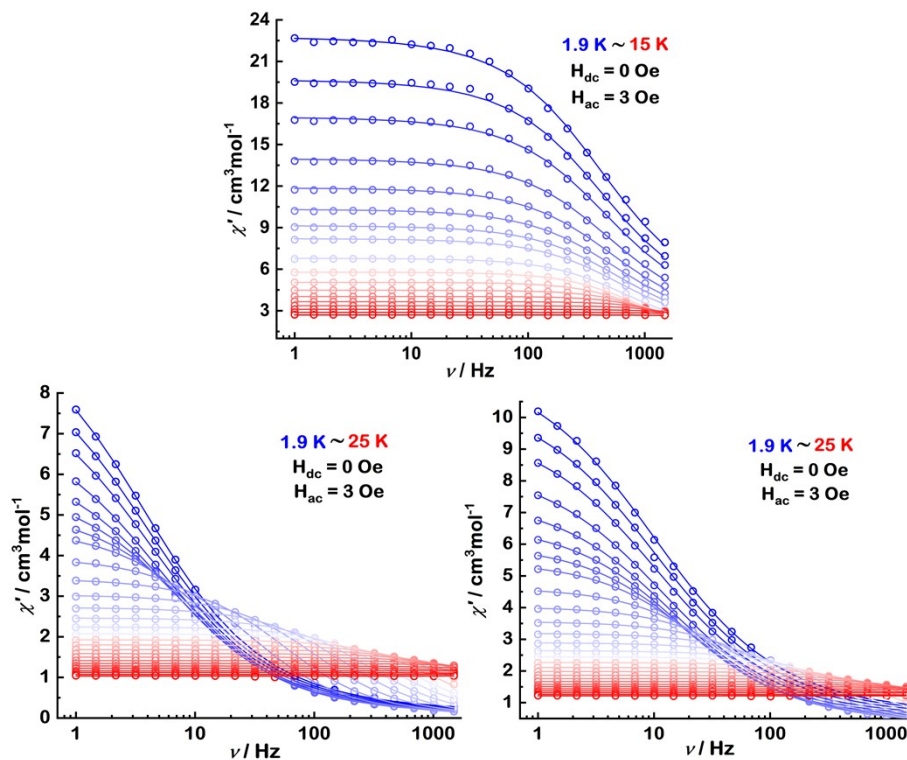

**Figure S11.** Frequency dependence of the in-phase ( $\chi'$ ) ac susceptibility signals for 1–3 (from top, bottom left to right) under zero-dc field. The solid lines correspond to the best fit.

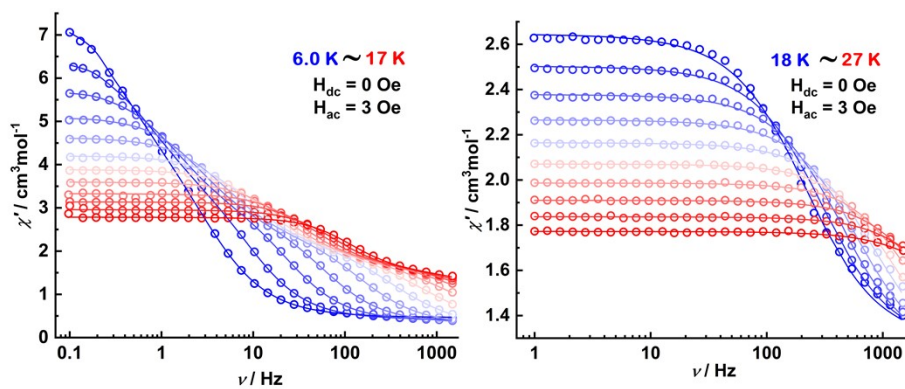

**Figure S12.** Frequency dependence of the in-phase ( $\chi'$ ) ac susceptibility signals for 4 under zero-dc field. The solid lines correspond to the best fit.

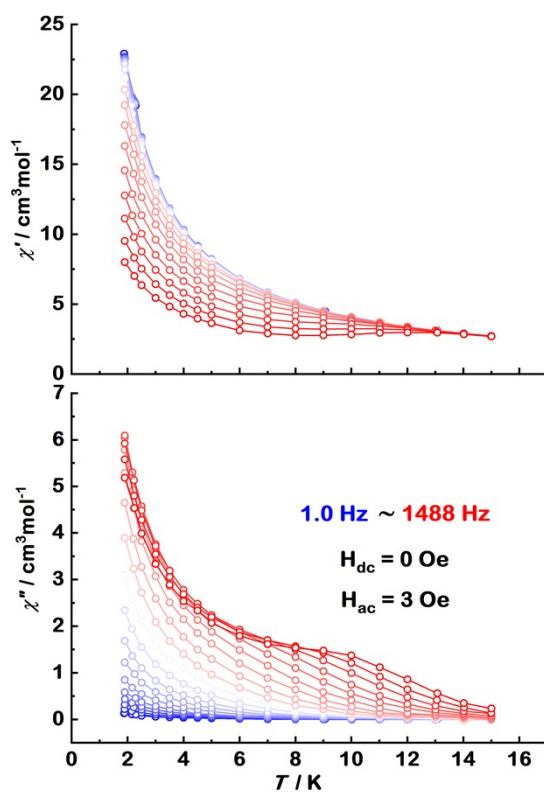

**Figure S13.** Plots of ac susceptibility vs. temperature at  $H_{ac} = 3.5 \text{ Oe}$ ,  $H_{dc} = 0 \text{ Oe}$ , oscillating at 1–1488 Hz for **1** in the temperature range of 1.9–15 K.

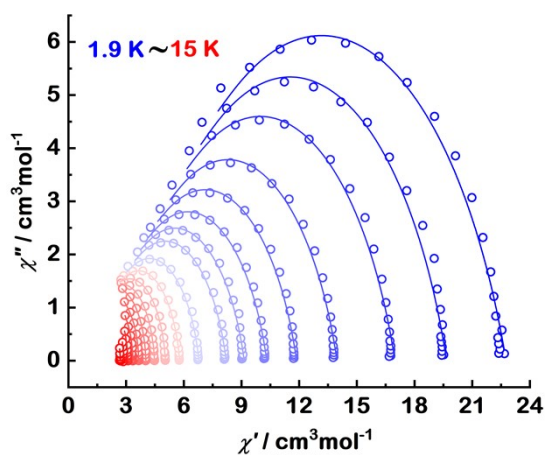

**Figure S14.** Cole–Cole plots for temperatures between 1.9 and 15 K under a zero dc field with the best fit to the generalized Debye model for **1**. The Solid lines represent fits to the data, as described in the main text.

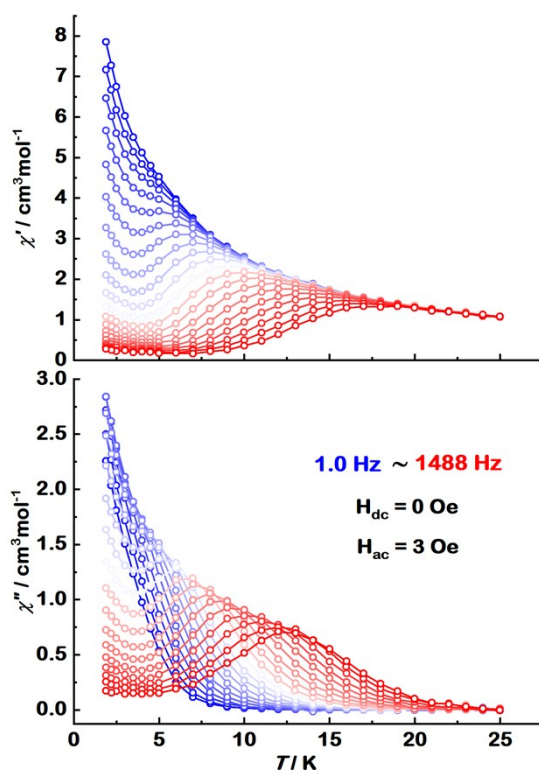

**Figure S15.** Plots of ac susceptibility vs. temperature at  $H_{\text{ac}} = 3.5 \text{ Oe}$ ,  $H_{\text{dc}} = 0 \text{ Oe}$ , oscillating at 1–1488 Hz for **2** in the temperature range of 1.9–15 K.

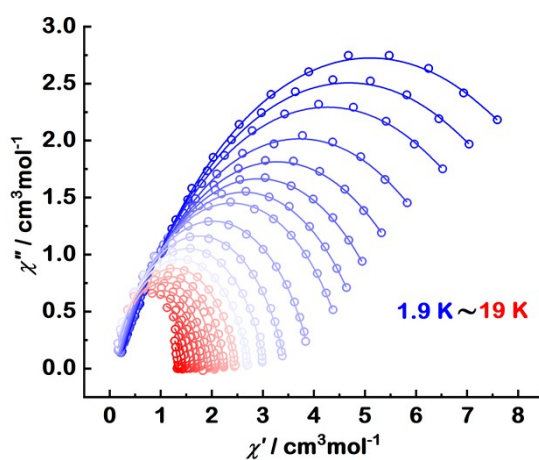

**Figure S16.** Cole–Cole plots for temperatures between 1.9 and 15 K under a zero dc field with the best fit to the generalized Debye model for **2**. The Solid lines represent fits to the data, as described in the main text.

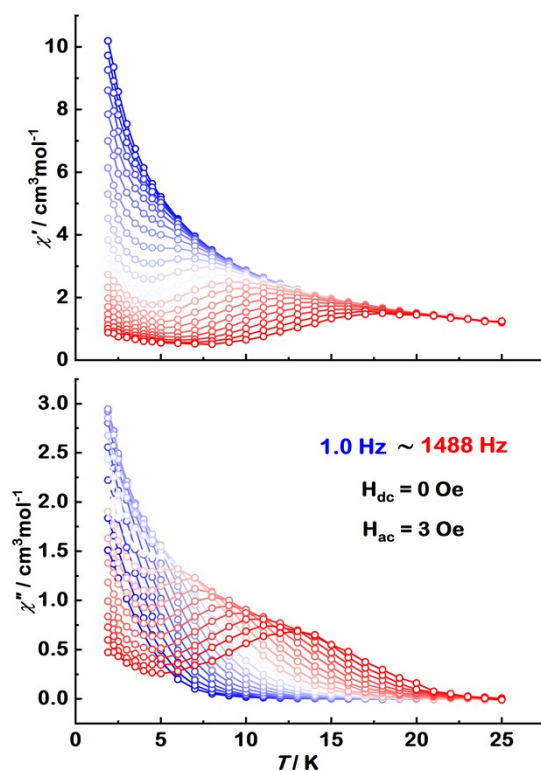

**Figure S17.** Plots of ac susceptibility vs. temperature at  $H_{ac} = 3.5$  Oe,  $H_{dc} = 0$  Oe, oscillating at 1–1488 Hz for **3** in the temperature range of 1.9–25 K.

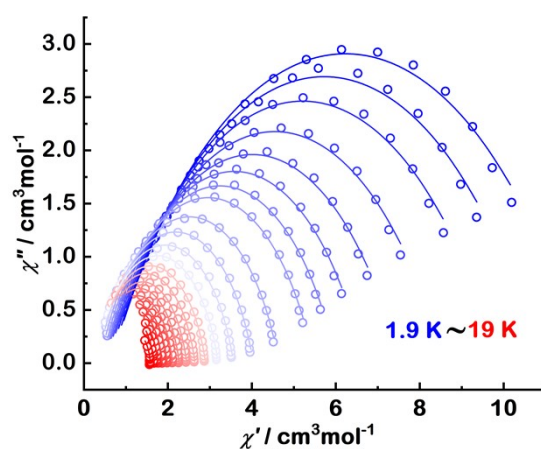

**Figure S18.** Cole–Cole plots for temperatures between 1.9 and 19 K under a zero dc field with the best fit to the generalized Debye model for **3**. The Solid lines represent fits to the data, as described in the main text.

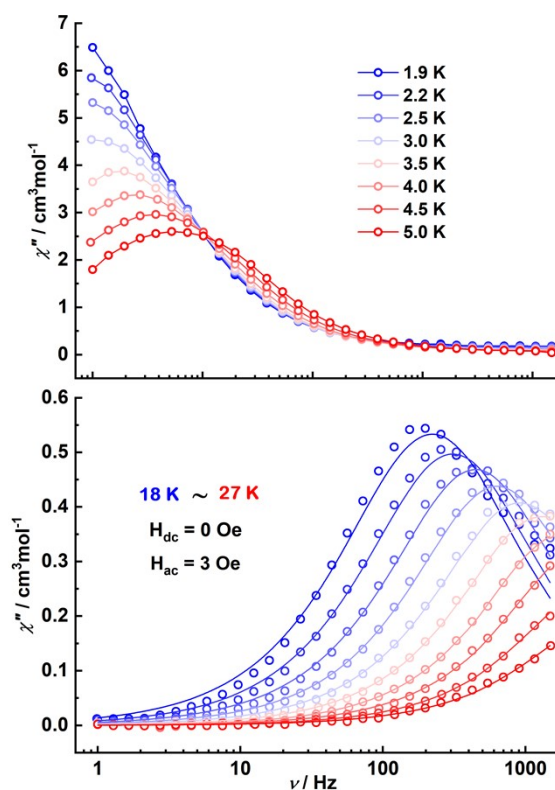

**Figure S19.** Frequency dependence of the out-of-phase ( $\chi''$ ) ac susceptibility signals for complex **4** between 1.9–5.0 K (top) and 18–27 K (bottom) under zero-dc field. The solid lines are guide for eyes (top) and correspond to the best fit (bottom).

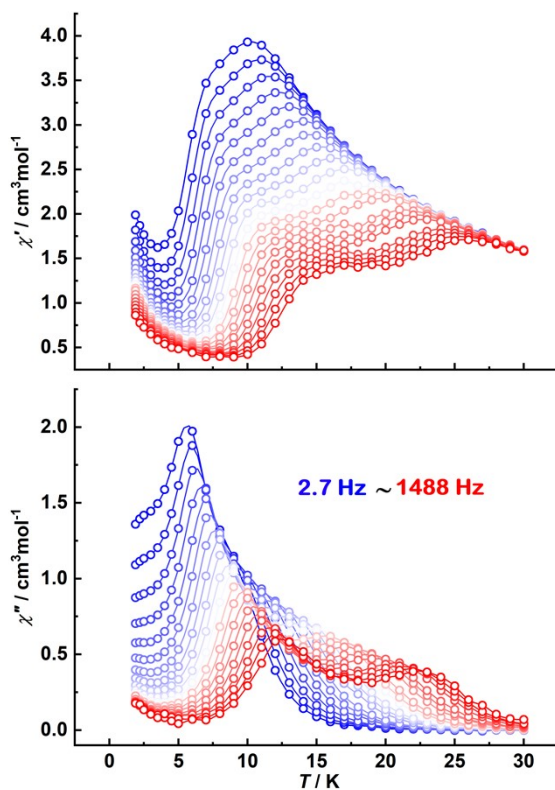

**Figure S21.** Plots of ac susceptibility vs. temperature at  $H_{\text{ac}} = 3.5 \text{ Oe}$ ,  $H_{\text{dc}} = 0 \text{ Oe}$ , oscillating at 1–1488 Hz for **4** in the temperature range of 1.9–30 K.

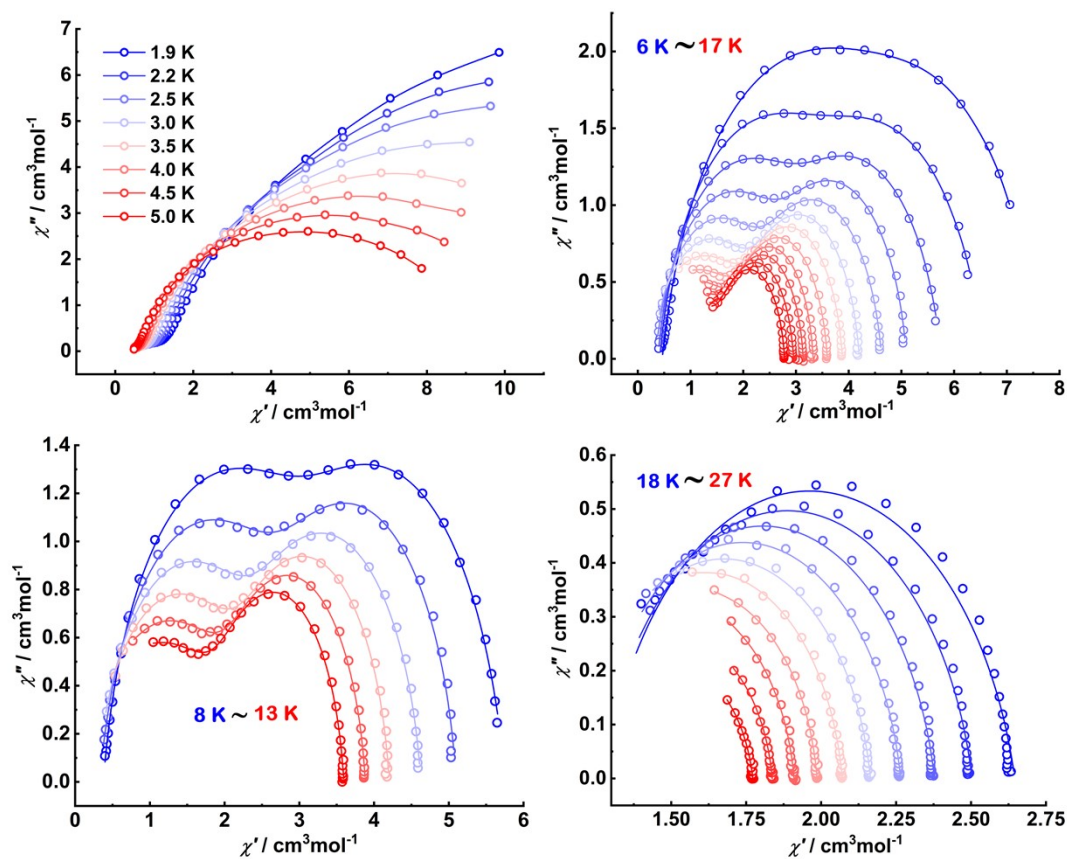

**Figure S20.** Cole–Cole plots for temperatures between 1.9 and 27 K under a zero dc field with the best fit to the generalized Debye model for **4**. The Solid lines represent fits to the data, as described in the main text.

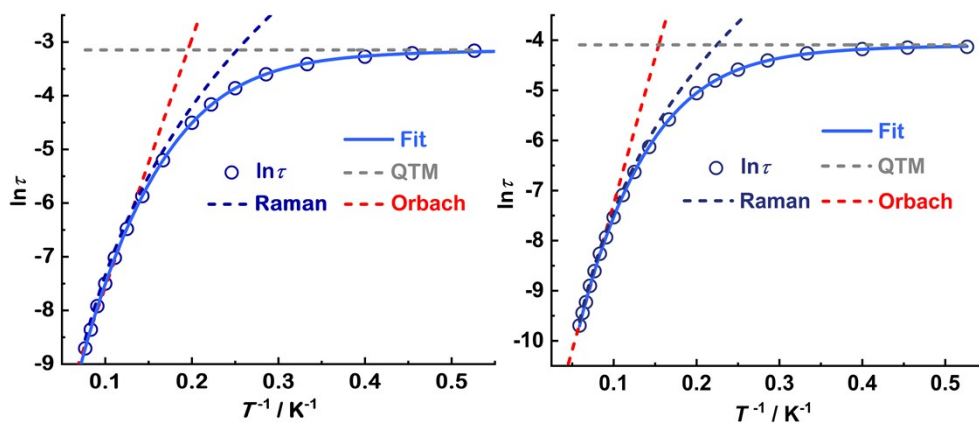

**Figure S22.** The plots of  $\ln\tau$  versus  $T^{-1}$  for **2** (left) and **3** (right) under zero DC field. The blue lines represent the fit to multiple relaxation processes using Equation 1 (main text).

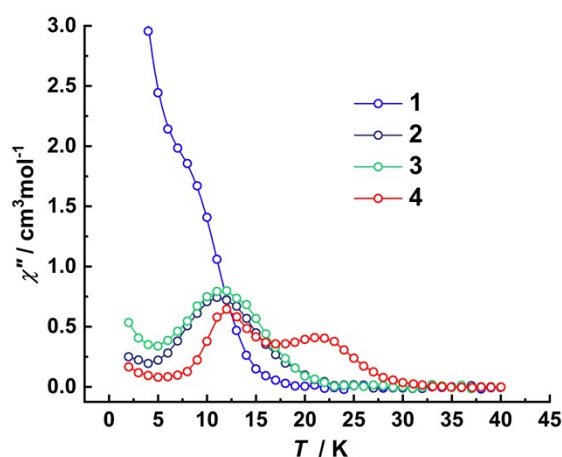

**Figure S23.** Temperature dependence of the ( $\chi''$ ) ac susceptibility components under zero dc-field and at 1000 Hz ac frequency for **1–4**.

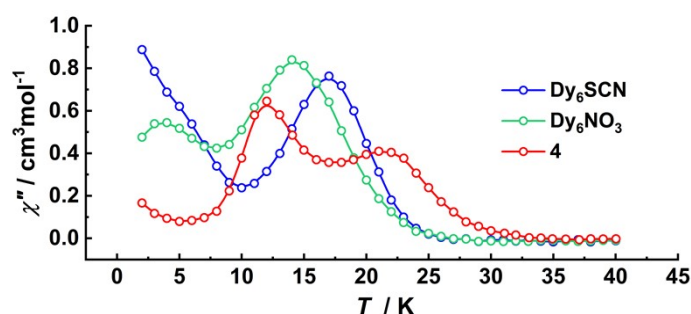

**Figure S24.** Temperature dependence of the ( $\chi''$ ) ac susceptibility components under zero dc-field and at 1000 Hz ac frequency for **Dy<sub>6</sub>–SCN**, **Dy<sub>6</sub>–NO<sub>3</sub>** and **4**, respectively.

**Table S6.** Fitting parameters for complexes **1–4**.

| Comple<br>x | $U_{\text{eff}}$ (K) | $\tau_0$ (s) | n    | $C$ ( $\text{s}^{-1}\text{K}^{-n}$ ) | $\tau_{\text{QTM}}$ |
|-------------|----------------------|--------------|------|--------------------------------------|---------------------|
| <b>1</b>    | 52.45                | 8.2E–7       | 0.39 | 2053.7                               | –                   |
| <b>2</b>    | 56.04                | 1.5E–5       | 4.54 | 0.04                                 | 23.26               |
| <b>3</b>    | 58.4                 | 2.3E–5       | 4.12 | 0.13                                 | 59.9                |
| <b>4–S</b>  | 207.25               | 2.17E–8      | 5.36 | 1.38E–4                              | –                   |
| <b>4–F</b>  | 94.98                | 7.48E–8      | 2.33 | 0.32                                 | –                   |

**Table S6.** The best fitting parameters for Cole–Cole plots of **1** at varying temperatures under zero applied dc field.

| $T$ (K) | $\chi_T$     | $\chi_S$     | $\alpha$     |
|---------|--------------|--------------|--------------|
| 1.9     | 0.227586E+02 | 0.357018E+01 | 0.271767E+00 |
| 2.2     | 0.196683E+02 | 0.340381E+01 | 0.254382E+00 |
| 2.5     | 0.169818E+02 | 0.298057E+01 | 0.254387E+00 |
| 3.0     | 0.139689E+02 | 0.262926E+01 | 0.244757E+00 |
| 3.5     | 0.118677E+02 | 0.233606E+01 | 0.237717E+00 |
| 4.0     | 0.103180E+02 | 0.210783E+01 | 0.231018E+00 |
| 4.5     | 0.914134E+01 | 0.192328E+01 | 0.223195E+00 |



|      |              |              |              |
|------|--------------|--------------|--------------|
| 5.0  | 0.820376E+01 | 0.186075E+01 | 0.207630E+00 |
| 6.0  | 0.678492E+01 | 0.164347E+01 | 0.174419E+00 |
| 7.0  | 0.578554E+01 | 0.151139E+01 | 0.138300E+00 |
| 8.0  | 0.504774E+01 | 0.136657E+01 | 0.102457E+00 |
| 9.0  | 0.447631E+01 | 0.114663E+01 | 0.826008E-01 |
| 10.0 | 0.402747E+01 | 0.103917E+01 | 0.527822E-01 |
| 11.0 | 0.365401E+01 | 0.105726E+01 | 0.320280E-01 |
| 12.0 | 0.335382E+01 | 0.102295E+01 | 0.204712E-01 |

**Table S7.** The best fitting parameters for Cole–Cole plots of **2** at varying temperatures under zero applied dc field.

| $T$ (K) | $\chi_T$     | $\chi_s$     | $\alpha$     |
|---------|--------------|--------------|--------------|
| 1.9     | 0.171003E+00 | 0.100318E+02 | 0.164636E+01 |
| 2.2     | 0.159463E+00 | 0.919902E+01 | 0.164831E+01 |
| 2.5     | 0.145334E+00 | 0.838580E+01 | 0.165014E+01 |
| 3.0     | 0.142188E+00 | 0.729271E+01 | 0.165735E+01 |
| 3.5     | 0.134370E+00 | 0.641740E+01 | 0.167059E+01 |
| 4.0     | 0.131785E+00 | 0.569463E+01 | 0.169133E+01 |
| 4.5     | 0.124097E+00 | 0.513443E+01 | 0.170899E+01 |
| 5.0     | 0.107110E+00 | 0.467705E+01 | 0.172566E+01 |
| 6.0     | 0.771950E-01 | 0.396440E+01 | 0.175317E+01 |
| 7.0     | 0.601547E-01 | 0.343909E+01 | 0.177381E+01 |
| 8.0     | 0.474027E-01 | 0.303628E+01 | 0.178783E+01 |
| 9.0     | 0.355674E-01 | 0.272397E+01 | 0.179585E+01 |
| 10.0    | 0.566129E-01 | 0.246678E+01 | 0.181081E+01 |
| 11.0    | 0.109211E+00 | 0.224408E+01 | 0.183258E+01 |
| 12.0    | 0.795037E-01 | 0.207612E+01 | 0.183300E+01 |
| 13.0    | 0.168688E+00 | 0.192526E+01 | 0.185098E+01 |
| 14.0    | 0.161811E+00 | 0.180060E+01 | 0.184752E+01 |
| 15.0    | 0.330864E+00 | 0.168483E+01 | 0.187441E+01 |

**Table S8.** The best fitting parameters for Cole–Cole plots of **3** at varying temperatures under zero applied dc field.

| $T$ (K) | $\chi_T$     | $\chi_s$     | $\alpha$     |
|---------|--------------|--------------|--------------|
| 1.9     | 0.118181E+02 | 0.651389E+00 | 0.385484E+00 |
| 2.2     | 0.108141E+02 | 0.635213E+00 | 0.377203E+00 |
| 2.5     | 0.983229E+01 | 0.592191E+00 | 0.373231E+00 |
| 3.0     | 0.853979E+01 | 0.559666E+00 | 0.360667E+00 |
| 3.5     | 0.748813E+01 | 0.533324E+00 | 0.342416E+00 |
| 4.0     | 0.665870E+01 | 0.506701E+00 | 0.320999E+00 |
| 4.5     | 0.601167E+01 | 0.474169E+00 | 0.305736E+00 |
| 5.0     | 0.547827E+01 | 0.433742E+00 | 0.291645E+00 |
| 6.0     | 0.464239E+01 | 0.388551E+00 | 0.263726E+00 |
| 7.0     | 0.403487E+01 | 0.338893E+00 | 0.245252E+00 |

|      |              |              |              |
|------|--------------|--------------|--------------|
| 8.0  | 0.356558E+01 | 0.316252E+00 | 0.230952E+00 |
| 9.0  | 0.319560E+01 | 0.314798E+00 | 0.215004E+00 |
| 10.0 | 0.289643E+01 | 0.296170E+00 | 0.212955E+00 |
| 11.0 | 0.264526E+01 | 0.303098E+00 | 0.199851E+00 |
| 12.0 | 0.244721E+01 | 0.353062E+00 | 0.190454E+00 |
| 13.0 | 0.226761E+01 | 0.380754E+00 | 0.178071E+00 |
| 14.0 | 0.211095E+01 | 0.457728E+00 | 0.159387E+00 |
| 15.0 | 0.198436E+01 | 0.521282E+00 | 0.163042E+00 |
| 16.0 | 0.186440E+01 | 0.651555E+00 | 0.132895E+00 |
| 17.0 | 0.175776E+01 | 0.762406E+00 | 0.109855E+00 |

**Table S9.** The best fitting parameters for Cole–Cole plots of **4** at varying temperatures under zero applied dc field.

| $T$ (K) | $\chi_{s, \text{tot}}$ | $\Delta\chi_1$ | $\Delta\chi_2$ | $\alpha_1$ | $\alpha_2$ |
|---------|------------------------|----------------|----------------|------------|------------|
| 6       | 0.462837               | 4.19811        | 2.88344        | 0.185820   | 0.118835   |
| 7       | 0.416741               | 2.99136        | 3.14972        | 0.144294   | 0.176163   |
| 8       | 0.379799               | 2.61702        | 2.75098        | 0.141080   | 0.150949   |
| 9       | 0.330834               | 2.39851        | 2.36889        | 0.160744   | 0.116412   |
| 10      | 0.289189               | 2.09119        | 2.24583        | 0.172721   | 0.129173   |
| 11      | 0.233489               | 1.99534        | 1.97349        | 0.219124   | 0.106147   |
| 12      | 0.0992182              | 2.05558        | 1.72896        | 0.309237   | 0.0909898  |
| 13      | 0.0314589              | 2.03966        | 1.52711        | 0.374204   | 0.0750385  |
| 14      | 0.0979910              | 1.85857        | 1.37323        | 0.388724   | 0.0515124  |
| 15      | 0.466148               | 1.36701        | 1.30570        | 0.348105   | 0.0588868  |
| 16      | 0.507442               | 1.28684        | 1.16478        | 0.407458   | 0.0515513  |
| 17      | 0.359484               | 1.28684        | 1.13806        | 0.370810   | 0.0589097  |

**Table S9.** The best fitting parameters for Cole–Cole plots of **4** at varying temperatures under zero applied dc field.

| $T$ (K) | $\chi_T$     | $\chi_s$     | $\alpha$     |
|---------|--------------|--------------|--------------|
| 18      | 0.264590E+01 | 0.127840E+01 | 0.152779E+00 |
| 19      | 0.250340E+01 | 0.127067E+01 | 0.132313E+00 |
| 20      | 0.237798E+01 | 0.123387E+01 | 0.122385E+00 |
| 21      | 0.226533E+01 | 0.121197E+01 | 0.112417E+00 |
| 22      | 0.216458E+01 | 0.118878E+01 | 0.109850E+00 |
| 23      | 0.207047E+01 | 0.117433E+01 | 0.971040E-01 |
| 24      | 0.198631E+01 | 0.117843E+01 | 0.882146E-01 |
| 25      | 0.190982E+01 | 0.114476E+01 | 0.977433E-01 |
| 26      | 0.183695E+01 | 0.123402E+01 | 0.985308E-01 |
| 27      | 0.177229E+01 | 0.126416E+01 | 0.126150E+00 |

## References

1. D. Casanova, M. Llunell, P. Alemany and S. Alvarez, *Chem. Eur. J.*, 2005, **11**, 1479-1494.
